# Supplementary material for: Transcriptome Analysis Elucidates the Potential Key Genes Involved in Rib Development in bmp6-Deficient Silver Carp (Hypophthalmichthys molitrix)
Source: MDPI journal article supplement (doi:10.3390/ani14101451), 2024-05-13
Supplement: s1 [file s1]

**Table S1. Primers used in this study.**

| Primer name                      | Sequences (5'-3')                                                                |
|----------------------------------|----------------------------------------------------------------------------------|
| <i>bmp6</i> -gRNA1-F             | TAATACGACTCACTATAGGAAGAGATTCTGTCCATACGTTTTAGAGCTAGAAATAGC                        |
| <i>bmp6</i> -gRNA2-F             | TAATACGACTCACTATAGGCCCAACTTCATACATCGGGTTTTAGAGCTAGAAATAGC                        |
| <i>bmp6</i> -gRNA3-F             | TAATACGACTCACTATAGGCAGGTAGTAGTTCTGTACGTTTTAGAGCTAGAAATAGC                        |
| sgRNA Scaffold Primer            | AAAAGCACCGACTCGGTGCCACTTTTTCAAGTTGATAACGGACTAGCCTTATTTTAACTTGCTATTTCTAGCTCTAAAAC |
| <i>bmp6</i> - mutant screening-F | CACCCTCATCATCATCACCAC                                                            |
| <i>bmp6</i> - mutant screening-R | CAGCATGAAGAGGGGTGCTG                                                             |
| <i>fos</i> -qPCR-F               | ACTGGGAGCCACTCTACACA                                                             |
| <i>fos</i> -qPCR-R               | AGTGAGGAGGGTTGGGGAAT                                                             |
| <i>bhmt</i> -qPCR-F              | GAGAGGATACGTGAAGGCCG                                                             |
| <i>bhmt</i> -qPCR-R              | TGCATGACATTTGACCCGGA                                                             |
| <i>card11</i> -qPCR-F            | GCACGATACCGAGCTACTCC                                                             |
| <i>card11</i> -qPCR-E            | TAGCTCTCGACAGACGTGGA                                                             |
| <i>ctgf</i> -qPCR-F              | ATGGGTAGTGGCTCAGGAGT                                                             |
| <i>ctgf</i> -qPCR-R              | TCGCAAACATCTCGCTCTGT                                                             |
| <i>metk</i> -qPCR-F              | CCTCTCGTGCTGTAGTGGAC                                                             |
| <i>metk</i> -qPCR-R              | CAAGGTGAACCCCTTGAGCA                                                             |
| <i>igh</i> -qPCR-F               | GTACGCTGATGTGCAATGCT                                                             |
| <i>igh</i> -qPCR-R               | TTCTGCGTGTTCAACTGTGC                                                             |
| <i>irak4</i> -qPCR-F             | GCCCAACGGATCTCTACTGG                                                             |
| <i>irak4</i> -qPCR-R             | CGTCAAACCGAAGTCGGAGA                                                             |
| <i>got1</i> -qPCR-F              | TTAGGCCTGCCAGAGTTTCG                                                             |
| <i>got1</i> -qPCR-R              | TTCCATTGTACCAACGGCGA                                                             |
